# Supplementary material for: Lewis acid ionic liquid catalysed synthesis of bioderived surfactants from β-pinene
Source: Royal Society of Chemistry journal article supplement (doi:10.1039/d4py00925h), 2024-01-01
Supplement: d4py00925h1.pdf [file d4py00925h1.pdf]

## Supplementary Information

### Lewis acid ionic liquid catalysed synthesis of bioderived surfactants from $\beta$ -pinene

Philippa L. Jacob,<sup>a</sup> Fabricio Machado,<sup>a,b</sup> Graham A. Rance,<sup>c</sup> Gary Walker,<sup>d</sup> Vincenzo Taresco,<sup>a</sup> Daniel J. Keddie<sup>a</sup> and Steven M. Howdle<sup>\*a</sup>

<sup>a</sup>School of Chemistry, University of Nottingham, University Park, Nottingham, NG7 2RD, UK

Email: steve.howdle@nottingham.ac.uk

<sup>b</sup>University of Brasília, Institute of Chemistry, Campus Universitário Darcy Ribeiro, Brasília, DF CEP: 70910-900, Brazil

<sup>c</sup>Nanoscale and Microscale Research Centre (nmRC), University of Nottingham, Nottingham, NG7 2QL, UK.

<sup>d</sup>Lubrizol Ltd., Hazelwood, Derby, DE56 4AN, UK.

**Table S1: Synthetic details for the preparation of ILs.**

| IL        | 1-Methylimidazole                   | Alkyl chloride  | Alkyl chloride                        | Acetonitrile (mL) | <sup>1</sup> H NMR conversion |
|-----------|-------------------------------------|-----------------|---------------------------------------|-------------------|-------------------------------|
| [bmim]-Cl | 1.00 equiv., 3.68 mL,<br>46.30 mmol | 1-Chlorobutane  | 1.30 equiv., 6.27 mL,<br>60.13 mmol   | 5                 | 70                            |
| [pmim]-Cl | 1.00 equiv., 7.36 mL,<br>95.50 mmol | 1-Chloropentane | 1.26 equiv., 14.54 mL,<br>120.25 mmol | 3                 | 70 <sup>a</sup>               |
| [omim]-Cl | 1.00 equiv., 7.36 mL,<br>95.50 mmol | 1-Chlorooctane  | 1.26 equiv., 20.43 mL,<br>120.25 mmol | 3                 | 51 <sup>b</sup>               |

<sup>a</sup> <sup>1</sup>H NMR conversion: 70% determined by comparing the integral of unreacted 1-methylimidazole at 6.91 ppm with that of 1-pentyl-3-methylimidazolium at 7.41 ppm. <sup>b</sup>

<sup>1</sup>H NMR conversion: 51%, determined by comparing the integral of unreacted 1-methylimidazole at 6.92 ppm with that of 1-octyl-3-methylimidazolium chloride at 7.40 ppm.

[pmim]-Cl: <sup>1</sup>H-NMR: (CDCl<sub>3</sub>,  $\delta$  in ppm): 0.88 (3H, t, N(CH<sub>2</sub>)<sub>4</sub>CH<sub>3</sub>), 1.32 (4H, m, N(CH<sub>2</sub>)<sub>2</sub>CH<sub>2</sub>CH<sub>2</sub>CH<sub>3</sub>), 1.91 (2H, m, NCH<sub>2</sub>CH<sub>2</sub>(CH<sub>2</sub>)<sub>2</sub>CH<sub>3</sub>), 4.12 (3H, s, NCH<sub>3</sub>), 4.33 (2H, t, NCH<sub>2</sub>(CH<sub>2</sub>)<sub>3</sub>CH<sub>3</sub>), 7.41 (1H, s, CH<sub>3</sub>NCHCHN), 7.58 (1H, s, CH<sub>3</sub>NCHCHN), 10.75 (1H, s, NCHN). These data are in agreement with that of Yang *et al.*<sup>1</sup>

[omim]-Cl: <sup>1</sup>H-NMR: (CDCl<sub>3</sub>,  $\delta$  in ppm): 0.77 (3H, t, N(CH<sub>3</sub>)<sub>7</sub>CH<sub>3</sub>), 1.16 (10H, m, N(CH<sub>3</sub>)<sub>2</sub>(CH<sub>2</sub>)<sub>5</sub>CH<sub>3</sub>), 1.82 (2H, m, NCH<sub>2</sub>CH<sub>2</sub>(CH<sub>2</sub>)<sub>5</sub>CH<sub>3</sub>), 4.04 (3H, s, NCH<sub>3</sub>), 4.22 (2H, t, NCH<sub>2</sub>(CH<sub>2</sub>)<sub>6</sub>CH<sub>3</sub>), 7.40 (1H, s, CH<sub>3</sub>NCHCHN), 7.63 (1H, s, CH<sub>3</sub>NCHCHN), 10.55 (1H, s, NCHN). These data are in agreement with that of Gómez *et al.*<sup>2</sup> Mass spectrometry: calculated *m/z* 195.1856, found *m/z* 195.1868 (M<sup>+</sup>, 100%).

**Table S2: Synthetic details for the preparation of LA-ILs.**

| LA-IL                                  | LA                 | FeCl <sub>3</sub>    |
|----------------------------------------|--------------------|----------------------|
| [bmim]-Fe <sub>2</sub> Cl <sub>7</sub> | 3.00 g, 17.23 mmol | 5.5902 g, 34.46 mmol |
| [pmim]-Fe <sub>2</sub> Cl <sub>7</sub> | 3.00 g, 15.95 mmol | 5.17 g, 31.89 mmol   |
| [omim]-Fe <sub>2</sub> Cl <sub>7</sub> | 3.00 g, 13.03 mmol | 4.23 g, 26.07 mmol   |

**Table S3: Synthetic details for the preparation of epoxidized PBP via mCPBA route.**

| Polymer | PBP             | mCPBA               | DCM    | Degree of epoxidation of alkenes (%) |
|---------|-----------------|---------------------|--------|--------------------------------------|
| EPBP-10 | 20 g, 0,147 mol | 3.04 g, 0.018 mol   | 200 mL | 13                                   |
| EPBP-50 | 20 g, 0.147 mol | 15.22 g, 0.088 mol, | 200 mL | 54                                   |

**Table S4: Synthetic details for the preparation of hydrolysis of EPBP.**

| Polymer   | Starting material (g)                                   | <i>p</i> -TsOH (10 mol %) | Toluene (mL) | Water (mL) | Degree of alkene functionalisation to diols (%) <sup>a</sup> |
|-----------|---------------------------------------------------------|---------------------------|--------------|------------|--------------------------------------------------------------|
| PBP-OH-10 | EPBP-10, 9.00 g (0.90 g epoxidized polymer, 5.96 mmol)  | 0.60 mmol, 0.10 g         | 200          | 20         | 13                                                           |
| PBP-OH-50 | EPBP-50, 9.00 g (4.50 g epoxidized polymer, 29.80 mmol) | 2.80 mmol, 0.51 g         | 270          | 90         | 54                                                           |
| PBP-OH-80 | EPBP-80, 2.00 g, 0132 mmol                              | 0.0013 mmol, 0.22 g       | 50           | 30         | 84                                                           |

<sup>a</sup>Assuming complete hydrolysis of epoxides.

## Supplementary Figures

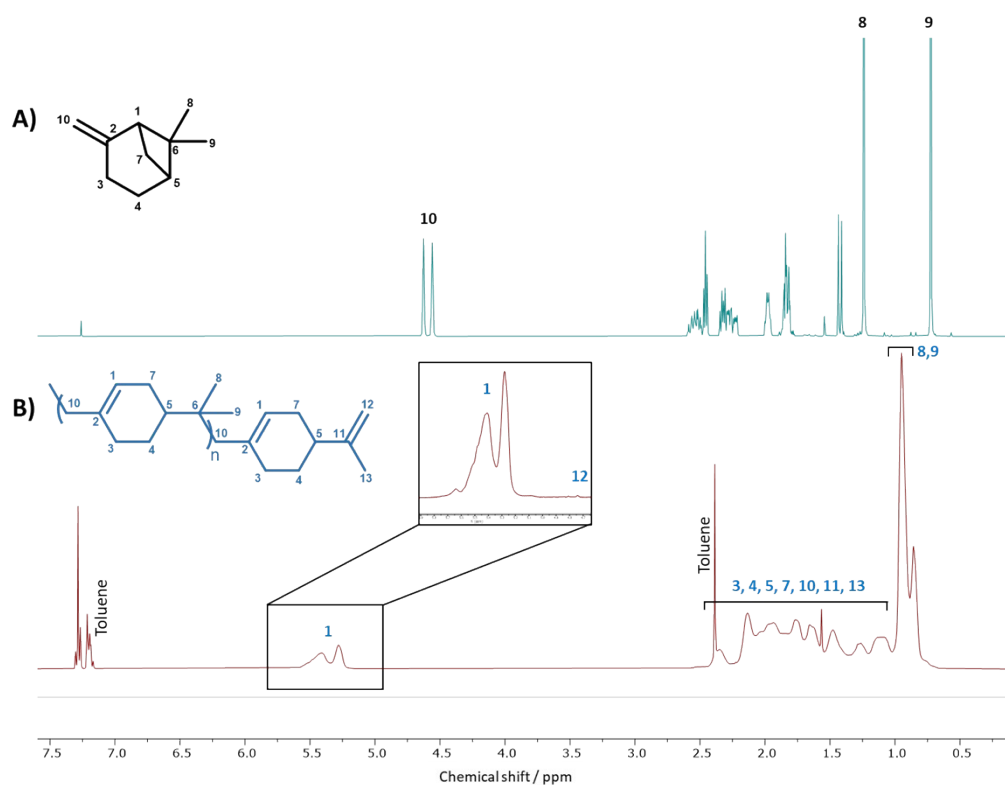

**Figure S1:**  $^1\text{H}$  NMR spectra of  $\beta\text{P}$  (upper) and PBP (lower) demonstrating the successful polymerisation. Full assignment of the  $^1\text{H}$  NMR spectrum of  $\beta\text{P}$  has been reported by Kolehmainen et al.<sup>3</sup>

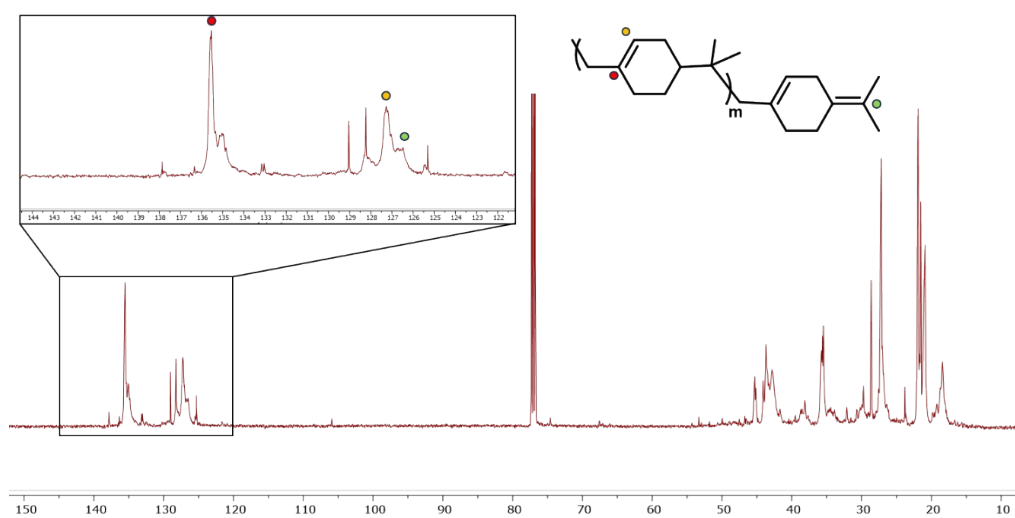

**Figure S2:**  $^{13}\text{C}$  NMR spectrum of PBP, synthesised using  $[\text{bmim}]\text{-Fe}_2\text{Cl}_7$ , demonstrating the predominantly endo-olefin end group of the polymer.

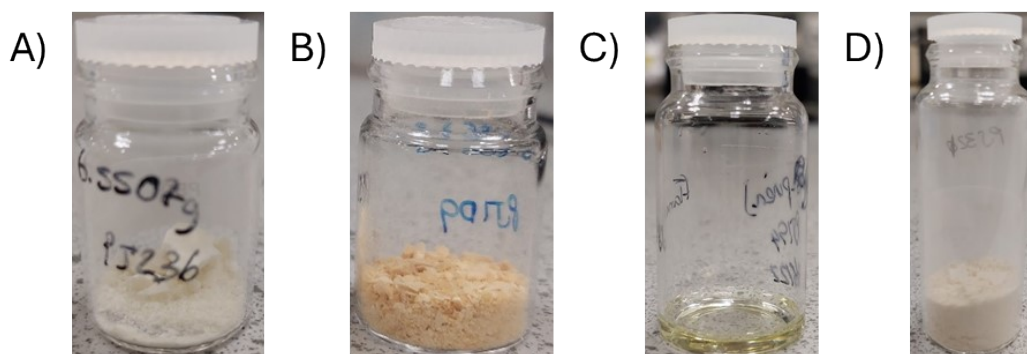

**Figure S3:** PBP A) synthesised using  $[bmim]-Fe_2Cl_7$  after purification with activated charcoal and extracted using  $scCO_2$  B) synthesised using  $[bmim]-Fe_2Cl_7$  and purified by aqueous washing and precipitation C) synthesised using  $FeCl_3$  and purified using activated charcoal D) synthesised using  $FeCl_3$  and purified with activated charcoal and extracted using  $scCO_2$ .

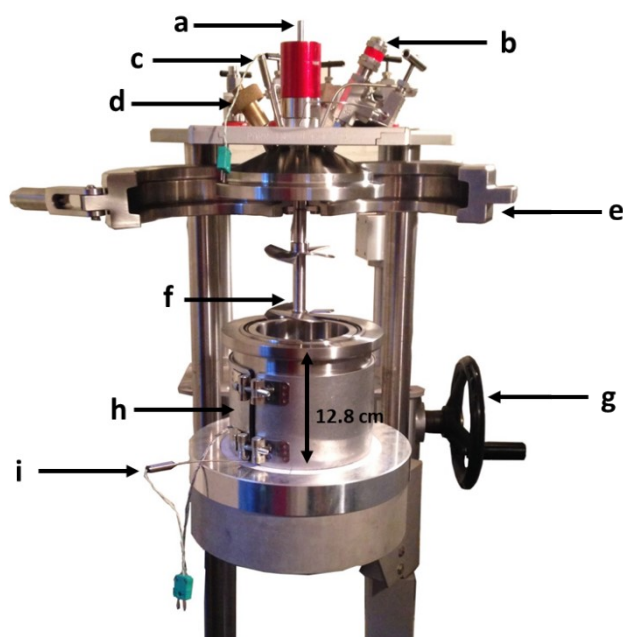

- |                          |               |                           |
|--------------------------|---------------|---------------------------|
| a. Overhead stirrer      | d. Safety key | g. Wheel to position base |
| b. Burst disk            | e. Clamp      | h. Heating jacket         |
| c. Internal thermocouple | f. Stirrer    | i. External thermocouple  |

**Figure S4:** 1 L  $scCO_2$  autoclave.

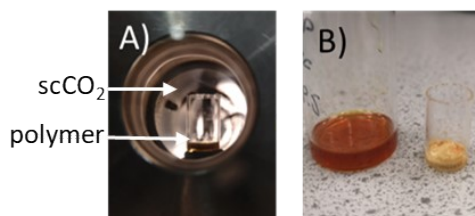

**Figure S5:** A) Solubility testing of PBP in  $scCO_2$  at 45 °C and 193 bar. Polymer can clearly be seen in the vial, unable to enter the  $scCO_2$  phase due to insolubility. B) PBP before (left) and after (right) exposure to  $scCO_2$ . After exposure to  $CO_2$  the polymer is no longer tacky, and bubbles can be seen in the polymer showing where  $CO_2$  has swollen the polymer matrix.

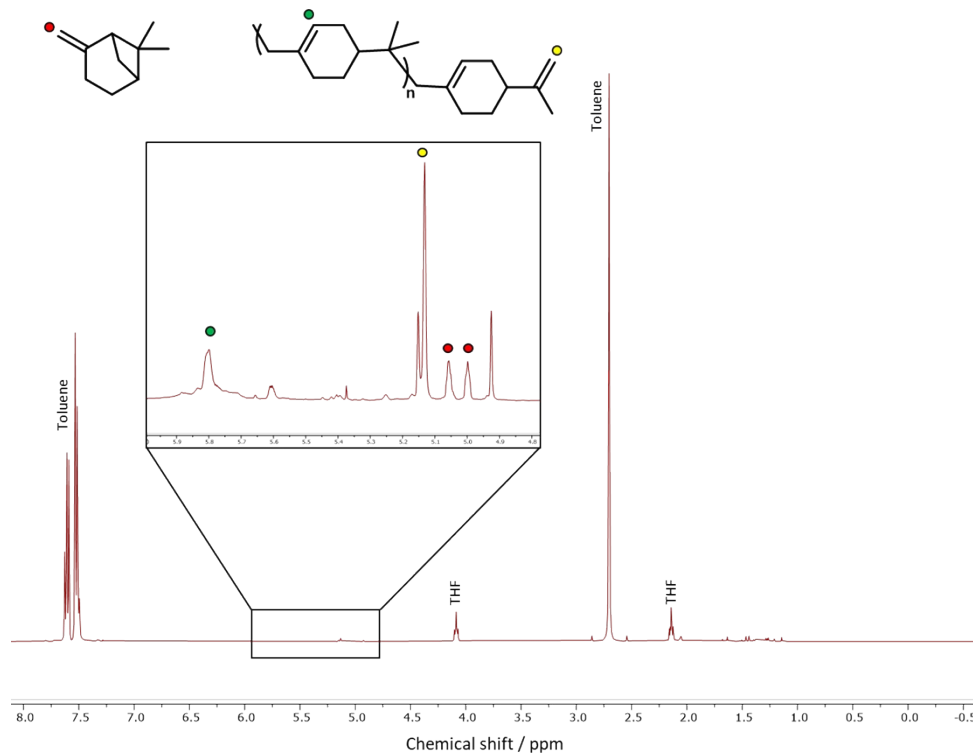

**Figure S6:**  $^1\text{H}$  NMR spectrum of the collected extract of PBP purification by  $\text{scCO}_2$  extraction.

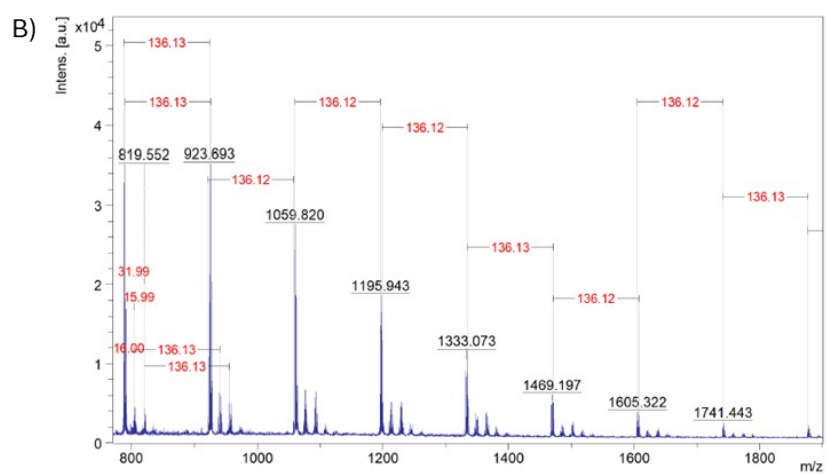

**Figure S7:** MALDI-ToF MS of PBP synthesised using  $[\text{bmim}]\text{-Fe}_2\text{Cl}_7$ . Silver trifluoroacetate was used as a cationisation agent and DCTB as a matrix. Note, as the reaction was quenched by adding  $\text{NaOH}$ , smaller peaks with an  $m/z$  difference of 16 are observed in addition to the major population.

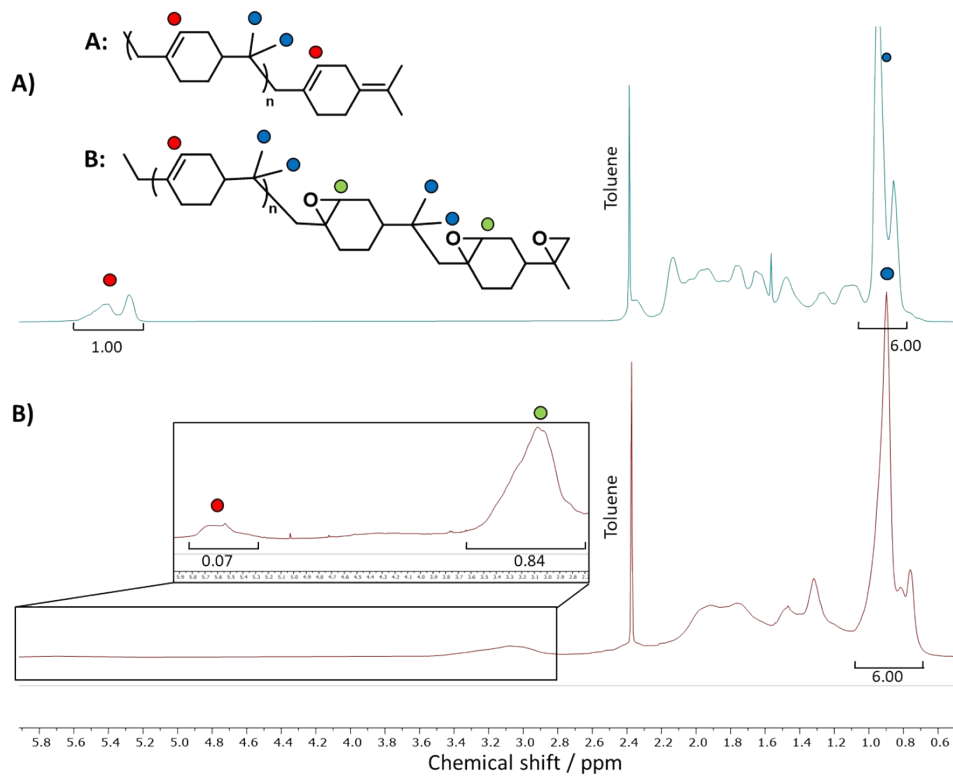

**Figure S8:**  $^1\text{H}$  NMR spectra of A) PBP and B) EPBP-80.

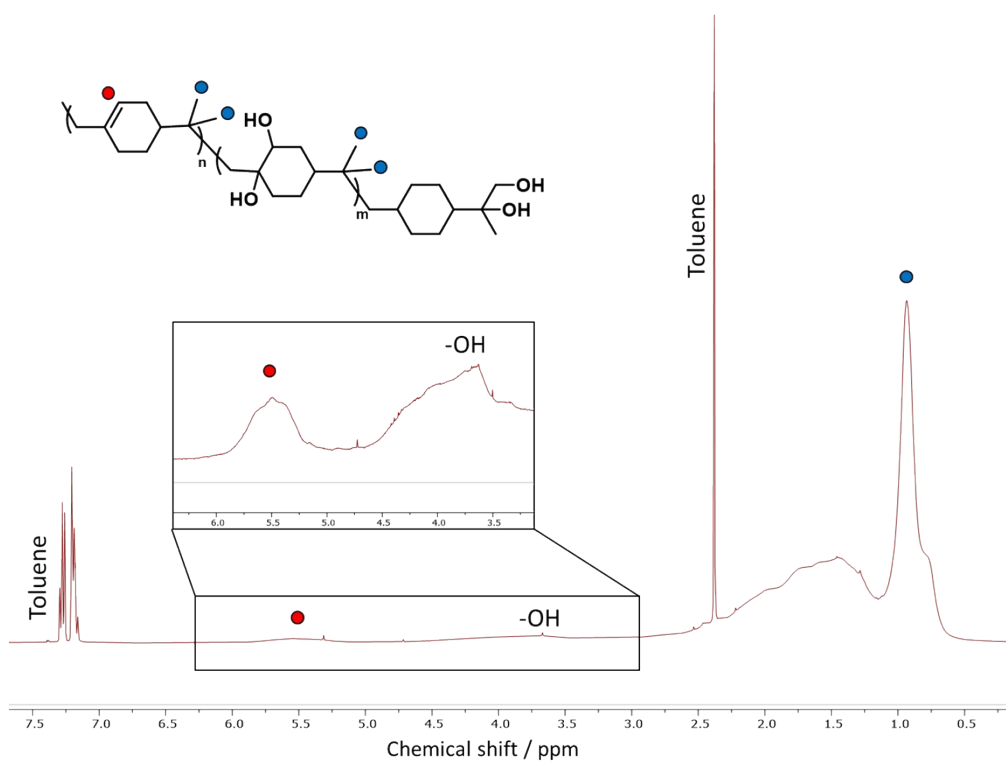

**Figure S9:**  $^1\text{H}$  NMR spectrum of PBP-OH-80.

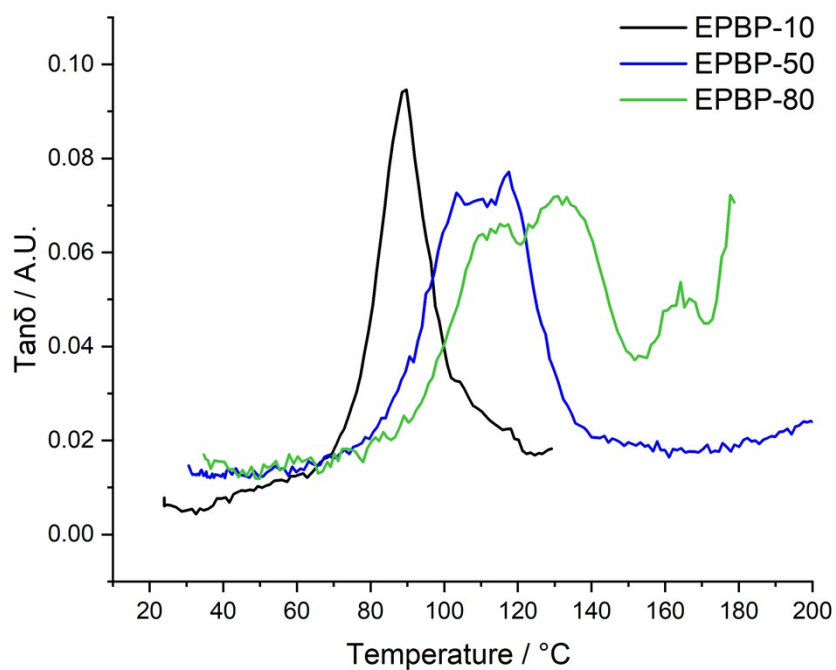

**Figure S10:** DMA of EPBPs, demonstrating increasing  $T_g$ s with increasing degrees of epoxidation. The second peak in the  $\tan\delta$  trace of EPBP-80 is likely the result of epoxide curing.

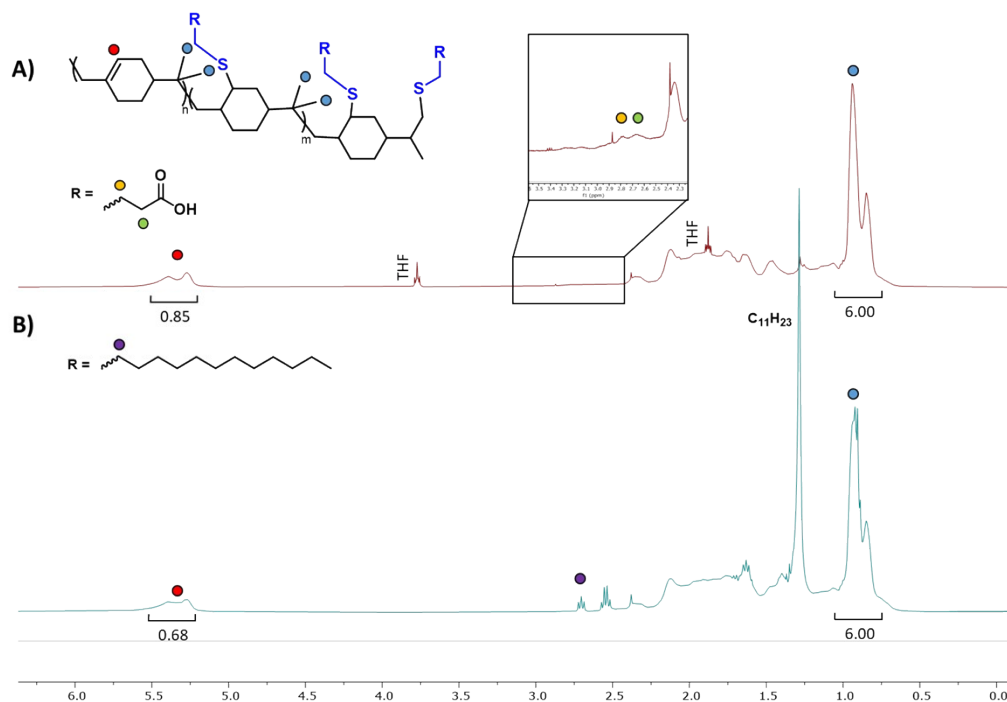

**Figure S11:**  $^1\text{H}$  NMR spectra of A) 3-mercaptopropionic acid functionalised PBP and B) dodecanethiol functionalised PBP.

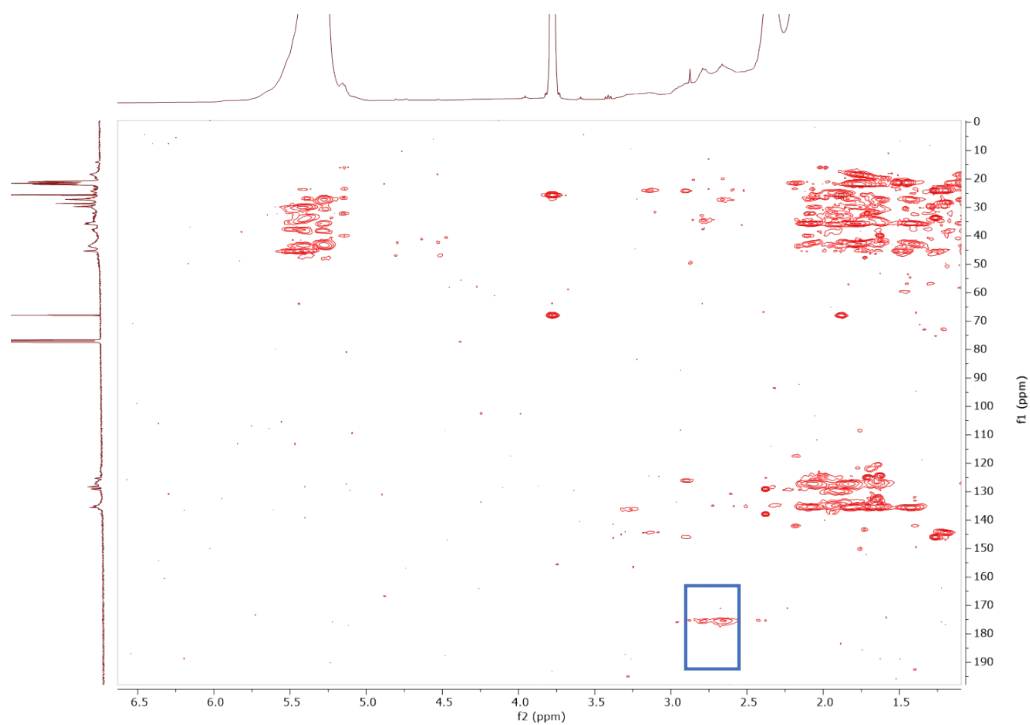

**Figure S12:** HMBC analysis of PBP-3-mercaptopropionic acid demonstrating the coupling of peaks between 2.80 and 2.65 ppm with a peak at 175 ppm.

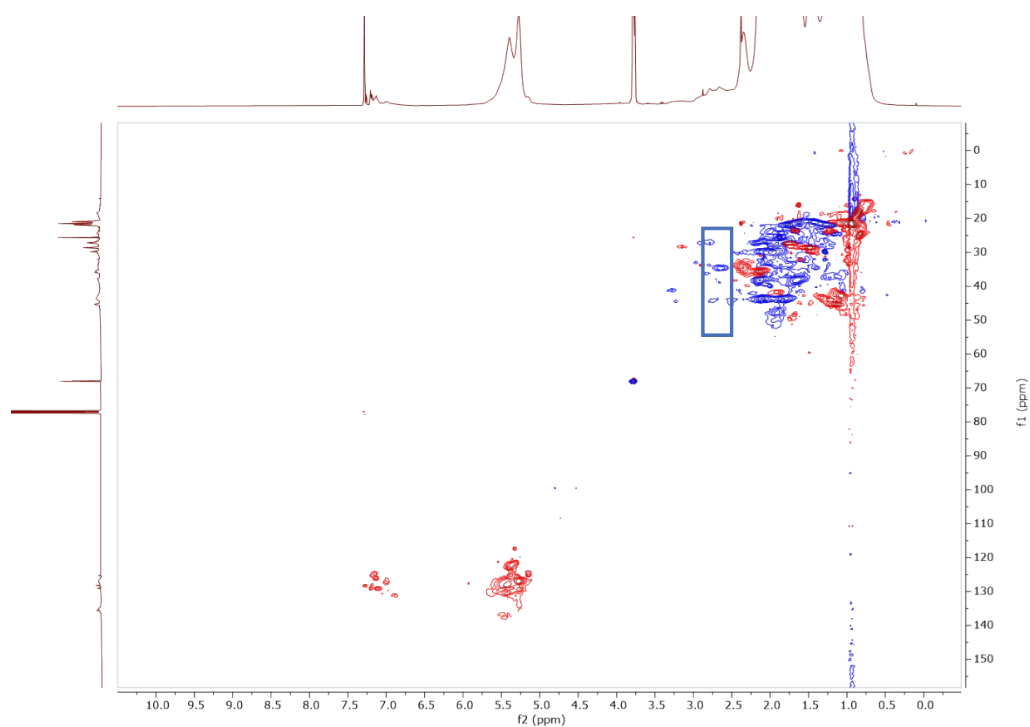

**Figure S13** Multiplicity edited HSQC analysis of PBP-3-mercaptopropionic acid demonstrating the presence of two  $-CH_2$  groups in blue.  $-CH_2$  groups are shown in the blue box,  $-CH$  and  $-CH_3$  groups are shown in red.

References:



1. J.-Z. Yang, W. Guan, J. Tong, H. Wang and L. Li, *J. Solution Chem.*, 2006, **35**, 845-852.
2. E. Gómez, B. González, Á. Domínguez, E. Tojo and J. Tojo, *Journal of Chemical & Engineering Data*, 2006, **51**, 696-701.
3. E. Kolehmainen, K. Laihia, R. Laatikainen, J. Vepsäläinen, M. Niemitz and R. Suontamo, *Magn. Reson. Chem.*, 1997, **35**, 463-467.
